# Supplementary figures and images for: Epigenetics and Proteomics Join Transcriptomics in the Quest for Tuberculosis Biomarkers
Source: PubMed Central journal article supplement — mBio. 2015 Sep 15;6(5):e01187-15. doi: 10.1128/mBio.01187-15 (PMC4600108; doi:10.1128/mbio.01187-15), 2015-09-15

A

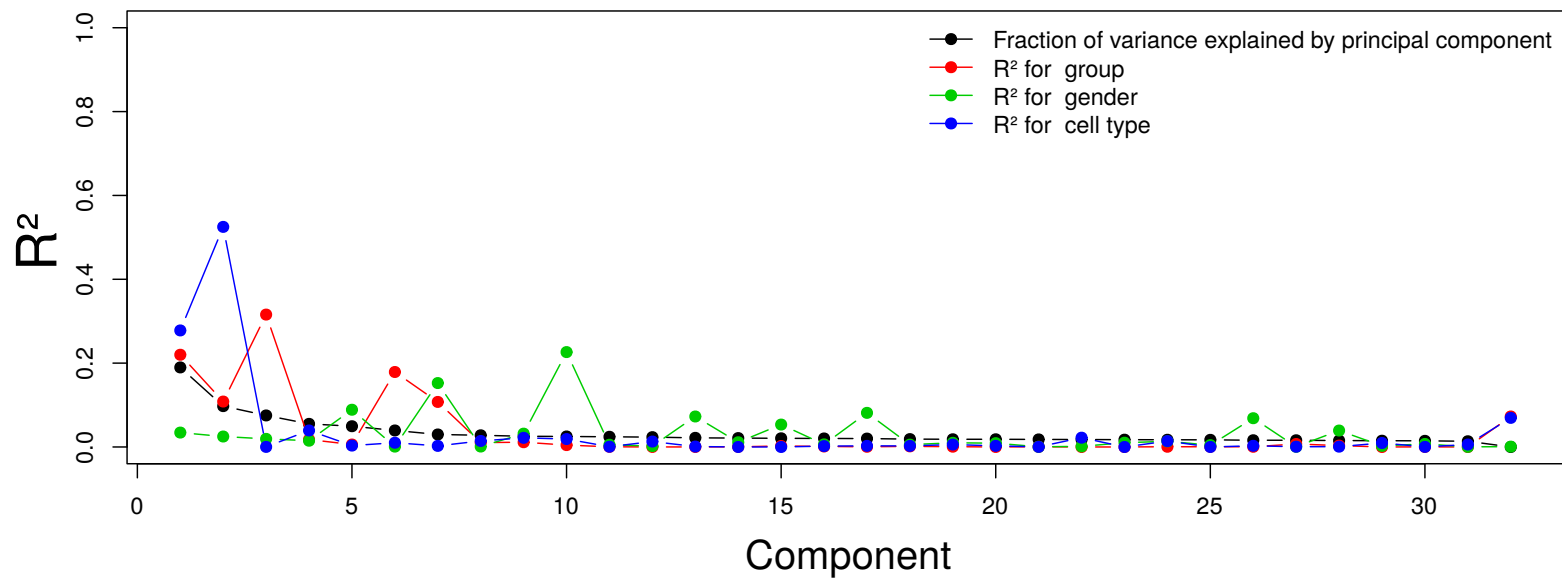

B

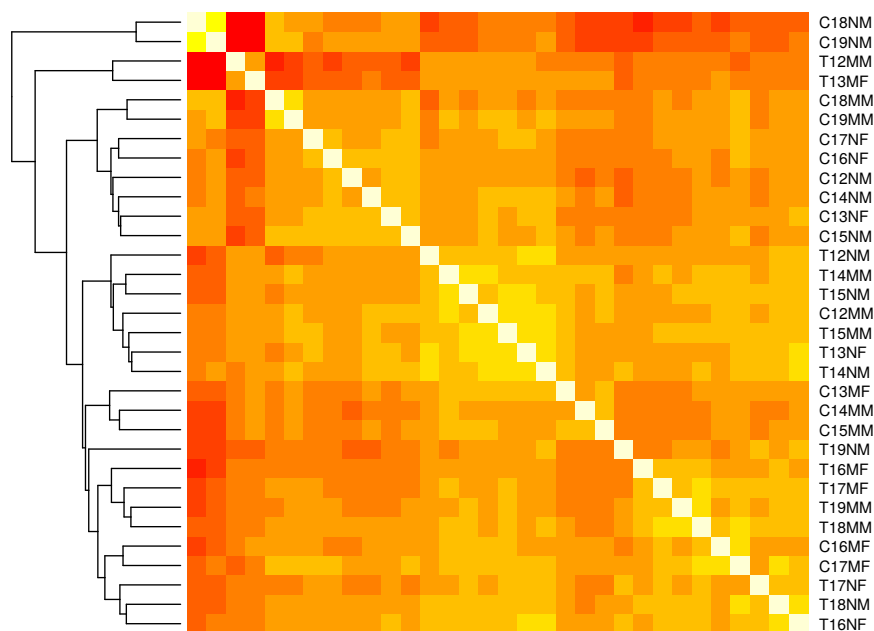

C

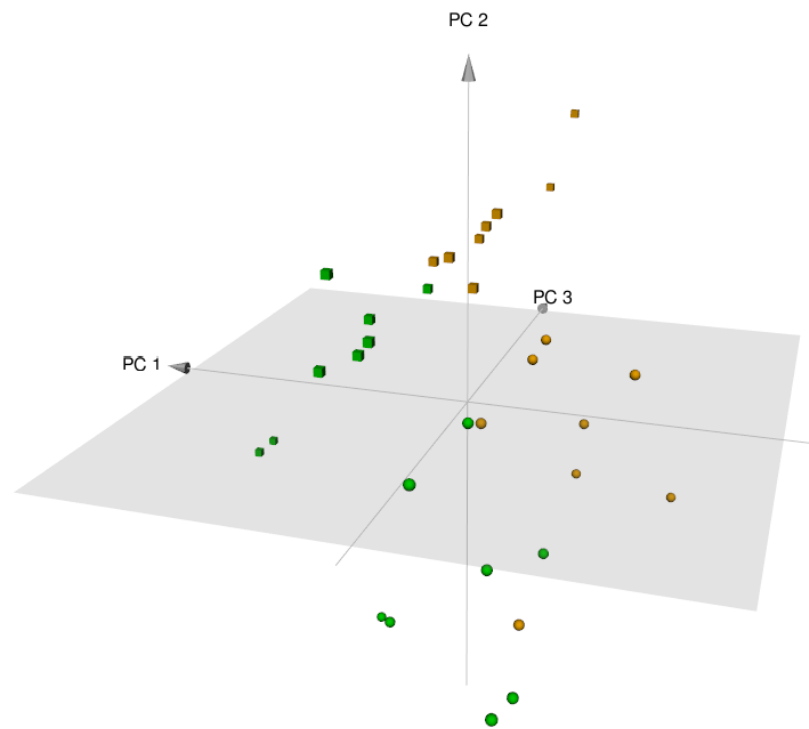

Supplement: mbo004152455sf3.pdf [file mbo004152455sf3.pdf]

**A**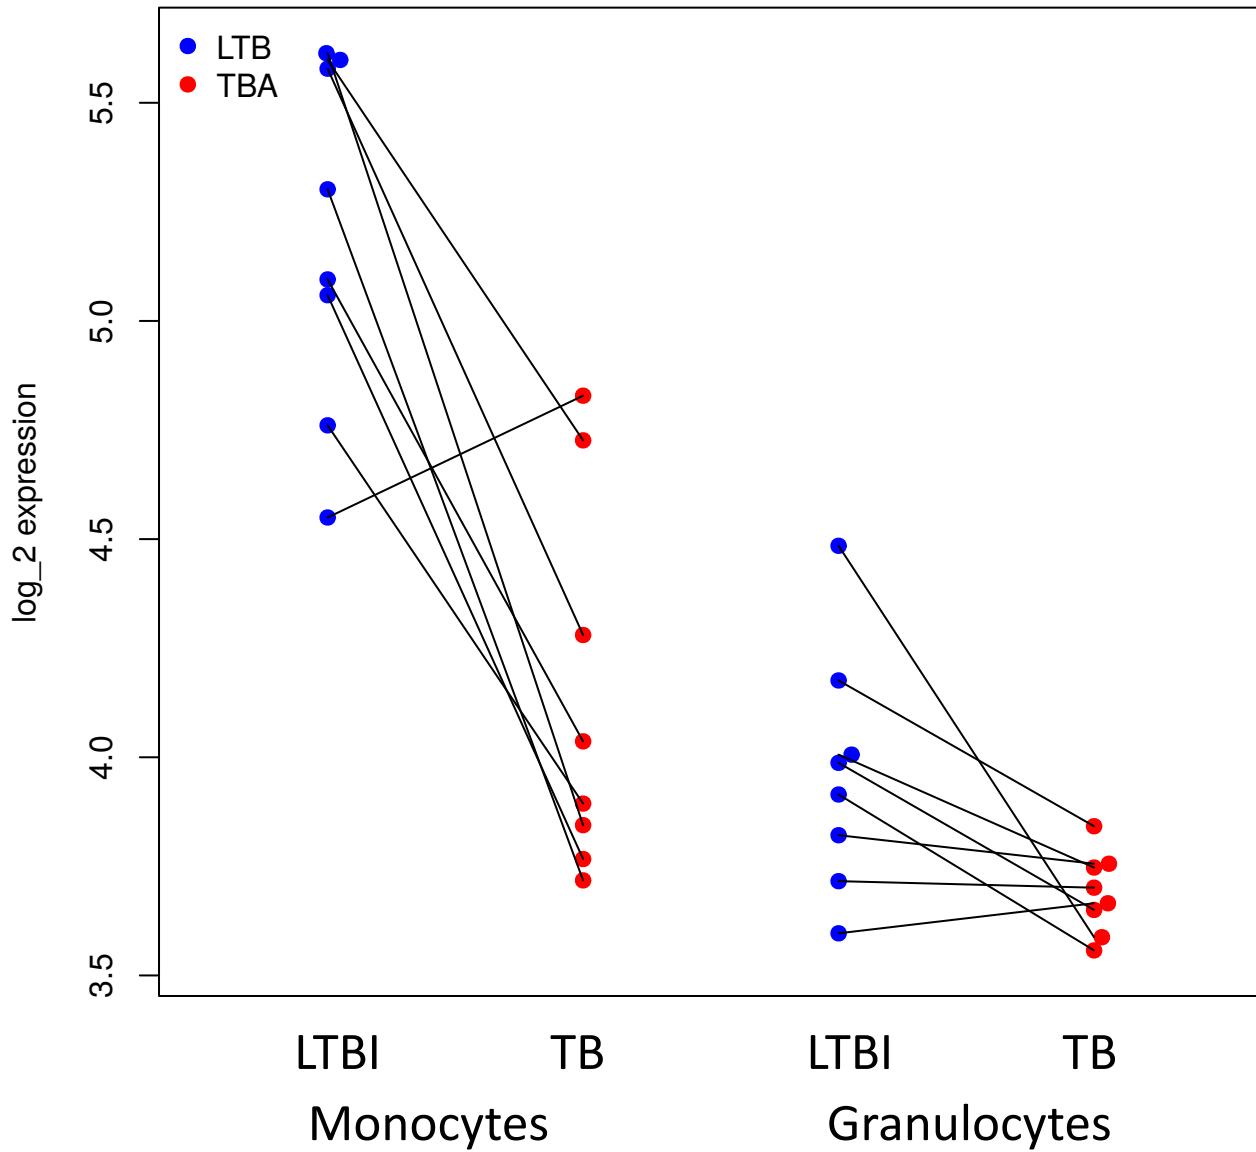**B**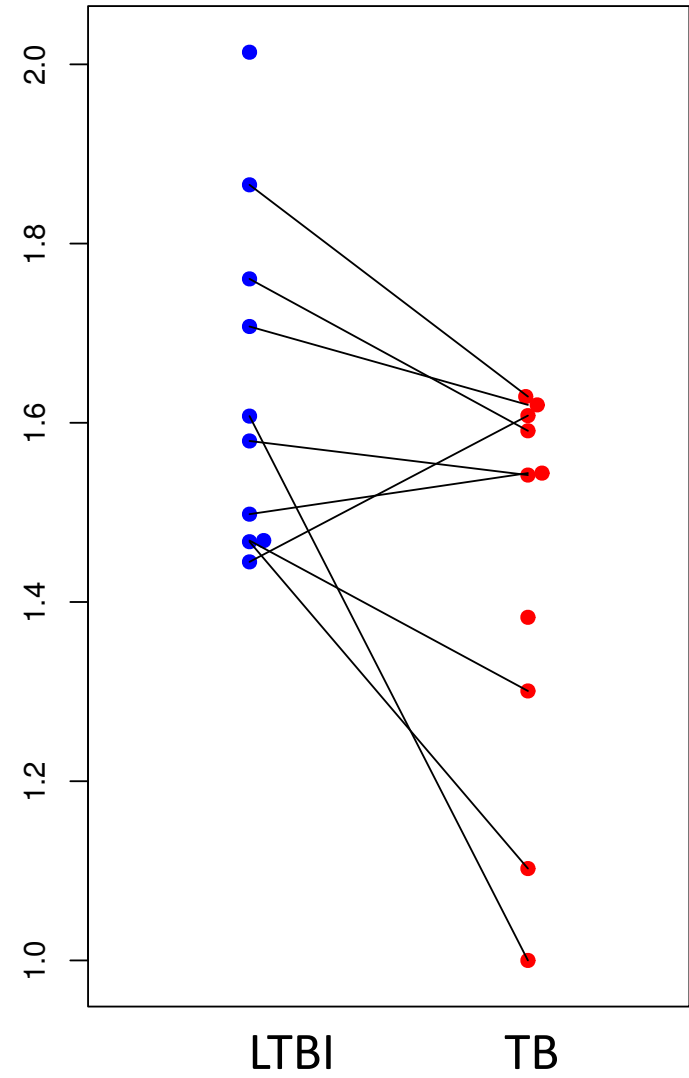

Supplement: mbo004152455sf4.pdf [file mbo004152455sf4.pdf]
